# Supplementary material
Source: publisher figshare collection journal article supplement (https://acs.figshare.com/ndownloader/files/8483165)
Supplement: Supplementary file 1 [file 8483165]

Compound	SMILE	SMN EC50 (uM)	Activation
LDN-75654 (4)	ClC1=CC(NC(C2=NOC(C(C)C)=C2)=O)=CC=C1F	1.8	242
4a	FC1=CC=C(NC(C2=NOC(C(C)C)=C2)=O)C=C1	1.8 ± 0.12	182 ± 26
4b	ClC1=CC(NC(C2=NOC(C(C)C)=C2)=O)=CC=C1	0.86 ± 0.13	160 ± 20
4c	O=C(C1=NOC(C(C)C)=C1)NC2=CC=CC=C2	0.28 ± 0.03	190 ± 32
4d	O=C(C1=NOC(C(C)C)=C1)NC2=CC=CC=C2F	0.26 ± 0.04	175 ± 13
4e	O=C(C1=NOC(C(C)C)=C1)NC2=CC=CC(F)=C2	0.34 ± 0.03	180 ± 32
4f	O=C(C1=NOC(C(C)C)=C1)NC2=CC=CC=C2Cl	6.2 ± 0.3	114 ± 2
4g	O=C(C1=NOC(C(C)C)=C1)NC2=CC=C(Cl)C=C2	2.8 ± 0.61	168 ± 23
4h	O=C(C1=NOC(C(C)C)=C1)NC2=CC=CC=C2OC	7.3 ± 2.4	80 ± 15
4i	O=C(C1=NOC(C(C)C)=C1)NC2=CC=CC(OC)=C2	3.6 ± 1.0	147 ± 7
4j	O=C(C1=NOC(C(C)C)=C1)NC2=CC=CC=C2C	5.4 ± 0.7	125 ± 25
4k	O=C(C1=NOC(C(C)C)=C1)NC2=CC=CC(C)=C2	1.8 ± 0.9	150 ± 12
4l	O=C(C1=NOC(C(C)C)=C1)NC2=CC=C(C)C=C2	1.4 ± 0.3	200 ± 10
4m	O=C(C1=NOC(C(C)C)=C1)NC2=CC=CC=N2	0.36 ± 0.09	195 ± 15
4n	O=C(C1=NOC(C(C)C)=C1)NC2=CN=CC=C2	9.9 ± 4.2	94 ± 2
4o	O=C(C1=NOC(C(C)C)=C1)NC2=CC=NC=C2	IA	IA
4p	O=C(C1=NOC(C(C)C)=C1)NC2=NC=CS2	0.78 ± 0.1	166 ± 23
4q	O=C(C1=NOC(C(C)C)=C1)NC2=NC=CO2	IA	IA
4r	O=C(C1=NOC(C(C)C)=C1)NC2=NC(C=CC=C3)=C3N2	0.26 ± 0.0	211 ± 2
4s	O=C(C1=NOC(C(C)C)=C1)NC2=NC(C=CC=C3)=C3N2C	2.6 ± 0.25	219 ± 11
4t	O=C(C1=NOC(C(C)C)=C1)NC2=NC(C=CC=C3)=C3S2	0.17 ± 0.01	124 ± 0.2
4u	O=C(C1=NOC(C(C)C)=C1)NC2CC(C=CC=C3)=C3C2	IA	IA
4v	O=C(C1=NOC(C(C)C)=C1)N2CCC3=C2C=CC=C3	0.72 ± 0.14	164 ± 3.5
8a	O=C(C1=NOC([H])=C1)NC2=CC(Cl)=C(F)C=C2	IA	IA
8b	O=C(C1=NOC(C)=C1)NC2=CC(Cl)=C(F)C=C2	IA	IA
8c	O=C(C1=NOC(CC)=C1)NC2=CC(Cl)=C(F)C=C2	8.8 ± 1.1	165 ± 8.4
8d	O=C(C1=NOC(CC(C)C)=C1)NC2=CC(Cl)=C(F)C=C2	1.5 ± 0.6	180 ± 16
8e	O=C(C1=NOC(C(C)(C)C)=C1)NC2=CC(Cl)=C(F)C=C2	1.93 ± 0.7	140 ± 21
8f	O=C(C1=NOC(C2CCCCC2)=C1)NC3=CC(Cl)=C(F)C=C3	IA	IA
8g	O=C(C1=NOC(C2CCCC2)=C1)NC3=CC(Cl)=C(F)C=C3	IA	IA
8h	O=C(C1=NOC(C2=CC=CC=C2)=C1)NC3=CC(Cl)=C(F)C=C3	IA	IA
8i	O=C(C1=NOC(CC2=CC=CC=C2)=C1)NC3=CC(Cl)=C(F)C=C3	3.56 ± 1.1	116 ± 15
9	O=C(C1=NOC(C(C)C)=C1)N(C)C2=CC(Cl)=C(F)C=C2	IA	IA
10	S=C(C1=NOC(C(C)C)=C1)NC2=CC(Cl)=C(F)C=C2	13.9 ± 2.4	120 ± 14
11	ClC1=C(F)C=CC(NCC2=NOC(C(C)C)=C2)=C1	11.2 ± 1.2	137 ± 2
13	ClC1=C(F)C=CC(OC(C2=NOC(C(C)C)=C2)=O)=C1	IA	IA
16	ClC1=C(F)C=CC(C(NC2=NOC(C(C)C)=C2)=O)=C1	9.9 ± 0.8	188 ± 13
19	CC(C)C1=CC(NC(NC2=CC(Cl)=C(F)C=C2)=O)=NO1	IA	IA
23	O=C(C1=NOC(C(C)C)=C1C)NC2=CC=C(F)C(Cl)=C2	0.5 ± 0.08	182 ± 23
24	ClC1=C(F)C=CC(C(NC2=CC(C(C)C)=NO2)=O)=C1	5.5 ± 2.3	137 ± 13
25	ClC1=C(F)C=CC(C(NC2=CSC(C(C)C)=N2)=O)=C1	1.6 ± 0.4	131 ± 11
26	ClC1=C(F)C=CC(C(NC2=NC=C(C3CCC3)S2)=O)=C1	0.5 ± 0.15	100 ± 16
27	O=C(NC1=NC=C(C2(O)CCC2)S1)C3=CC(Cl)=C(F)C=C3	0.29 ± 0.09	190 ± 11
